# Supplementary material for: Reciprocal interplay between asporin and decorin: Implications in gastric cancer prognosis
Source: PubMed Central journal article supplement (PMC8357146; doi:10.1371/journal.pone.0255915), 2021-08-11
Supplement: pone.0255915.s008.pdf [file pone.0255915.s008.pdf]

**Fig 3G**

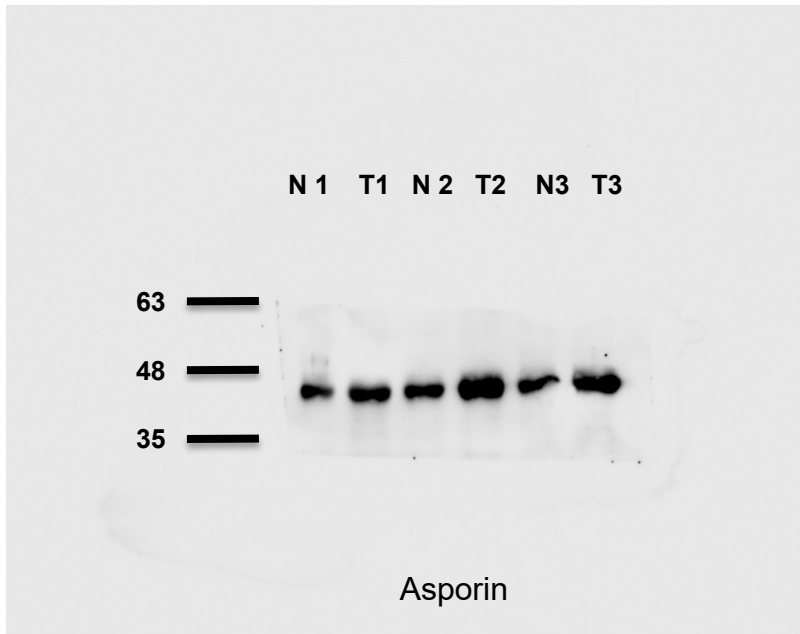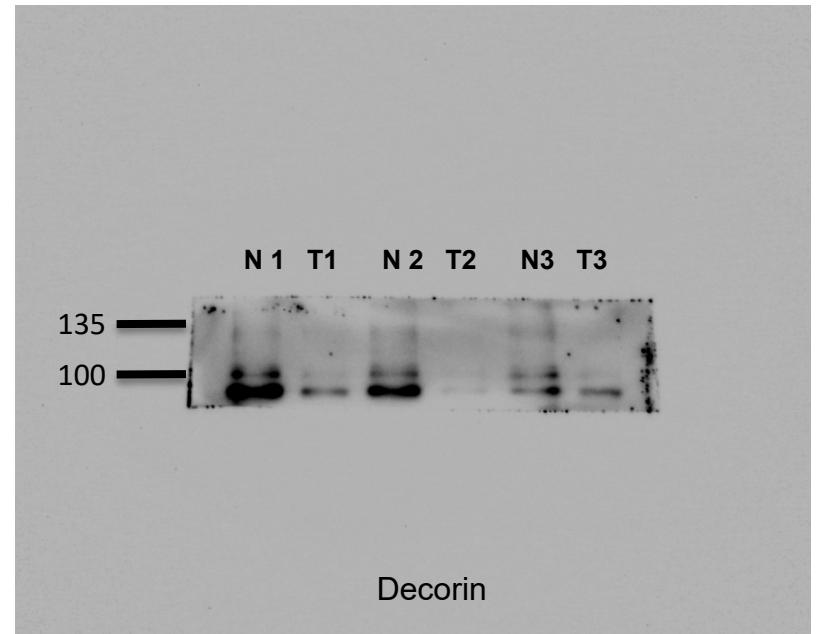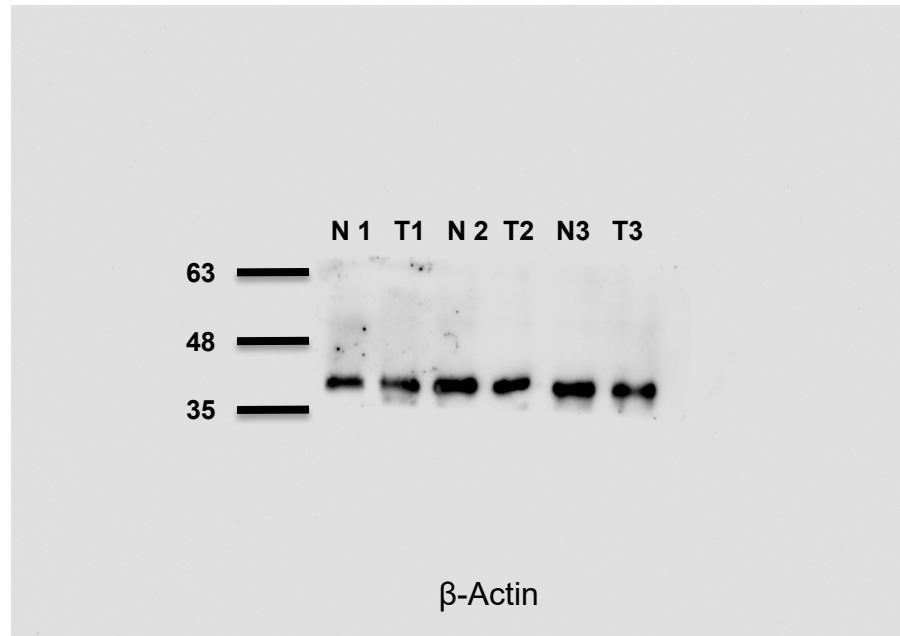

All bands were detected using chemiluminescence

**Fig 5D**

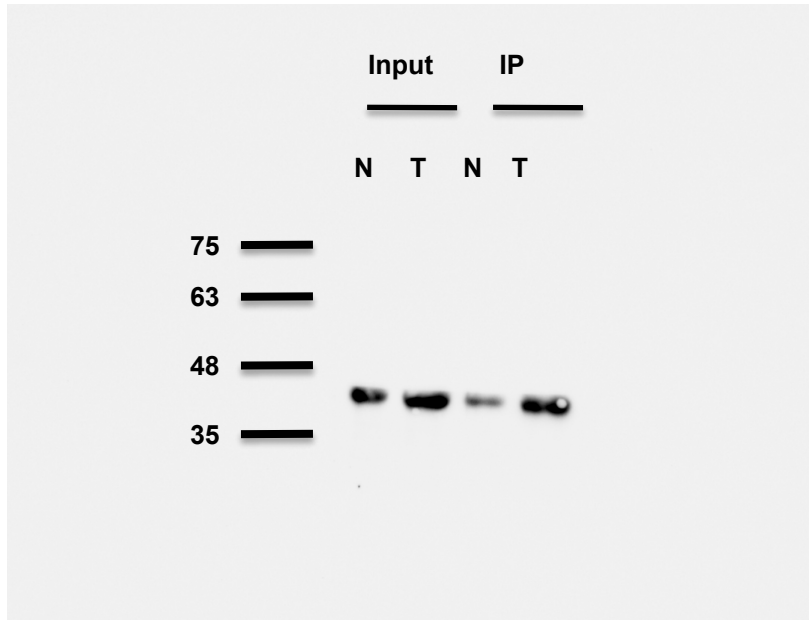

IB: Asporin IP: TGF $\beta$

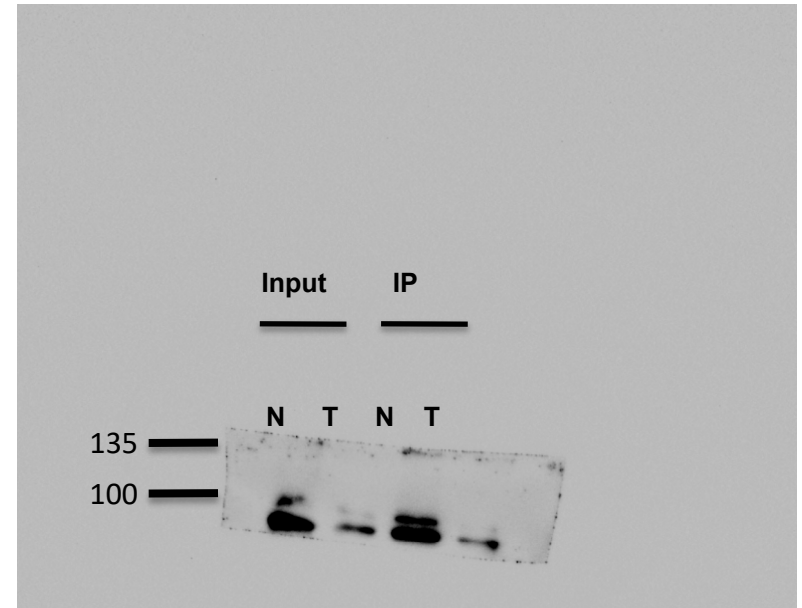

IB: Decorin IP: TGF $\beta$

All bands were detected using chemiluminescence

**Fig 5E**

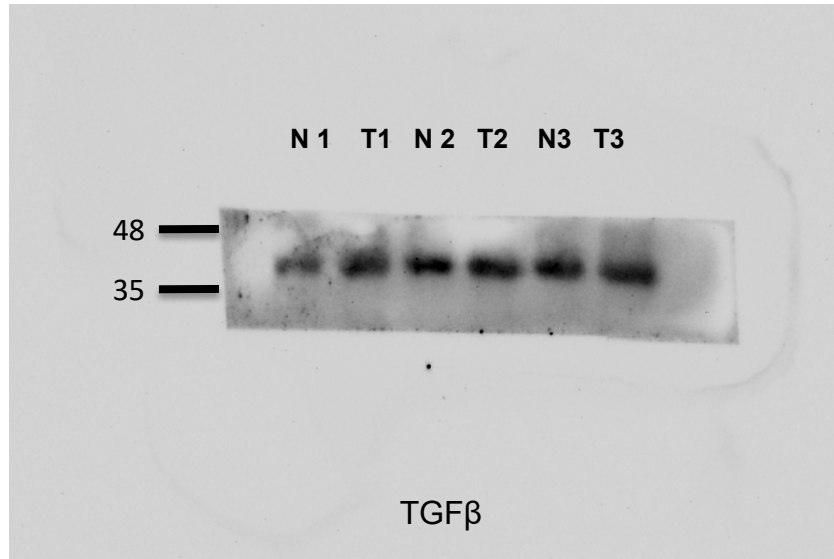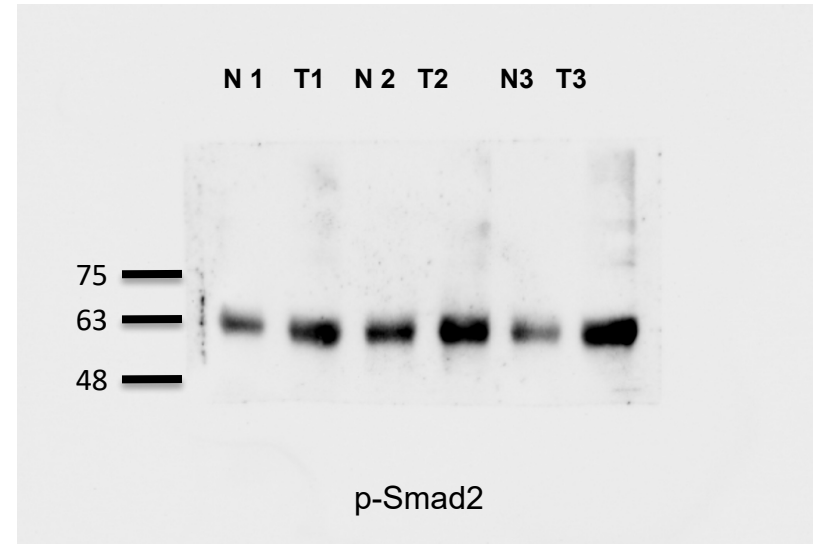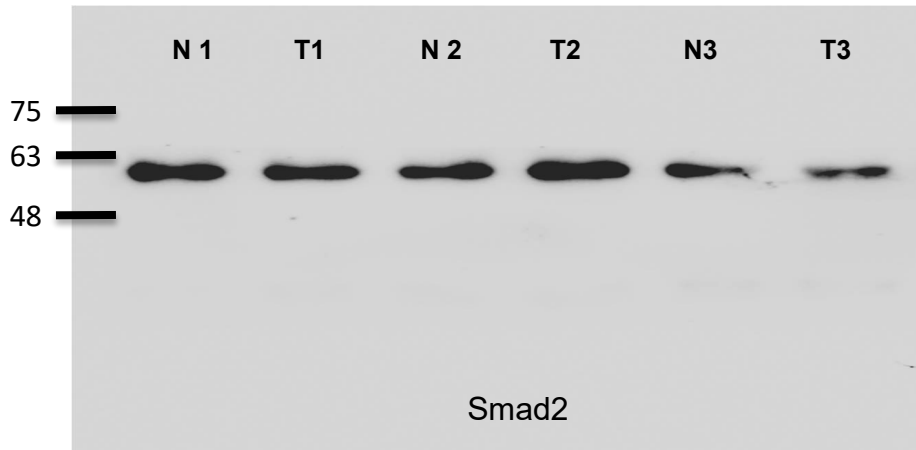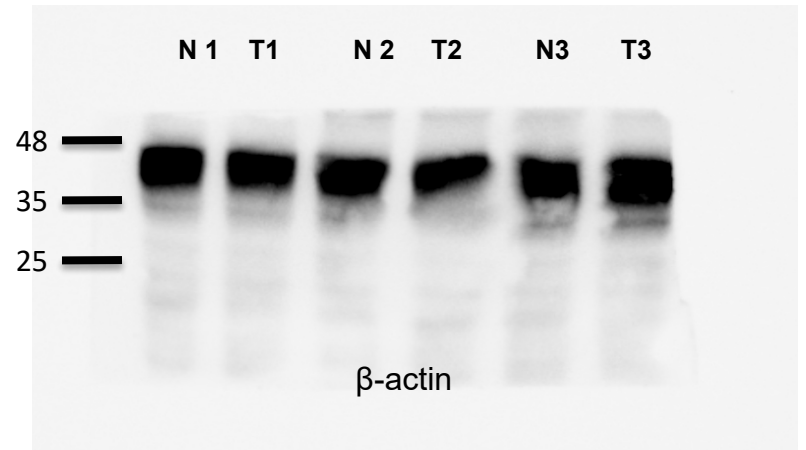

All bands were detected using chemiluminescence

**Fig 6B**

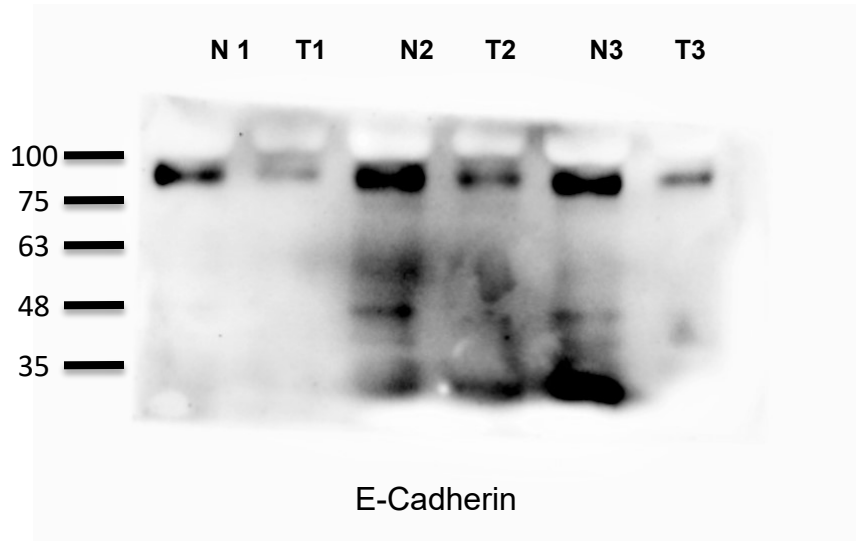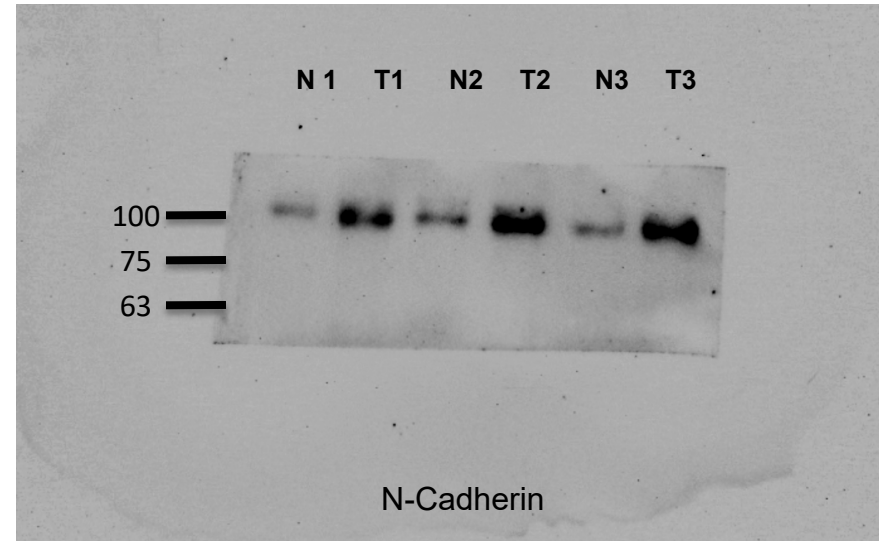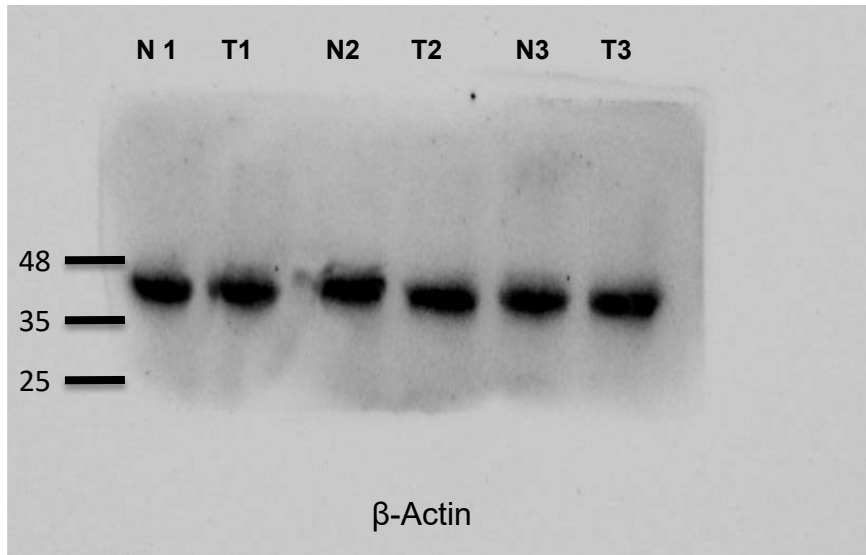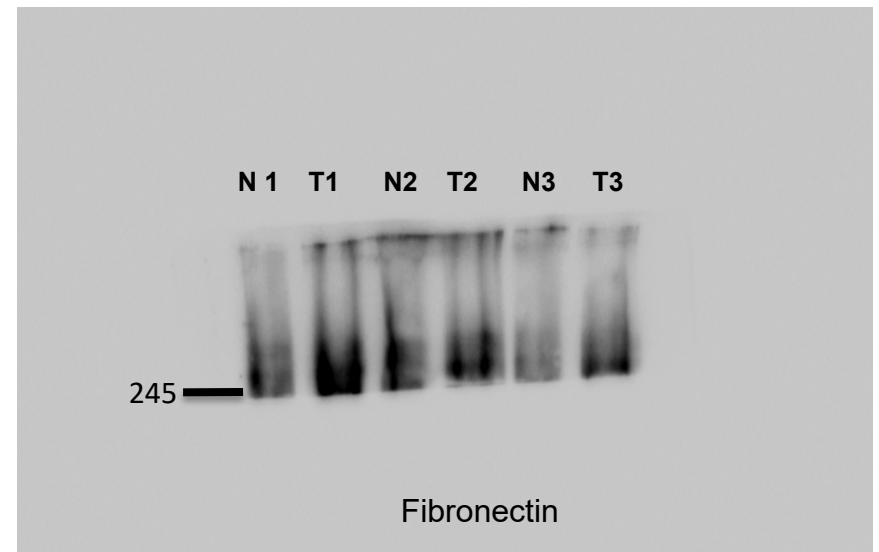

All bands were detected using chemiluminescence

**Fig 6D**

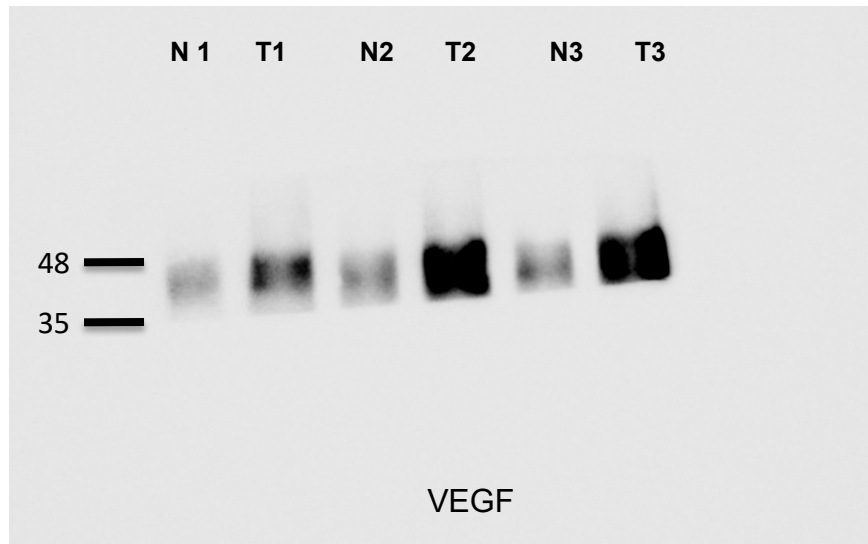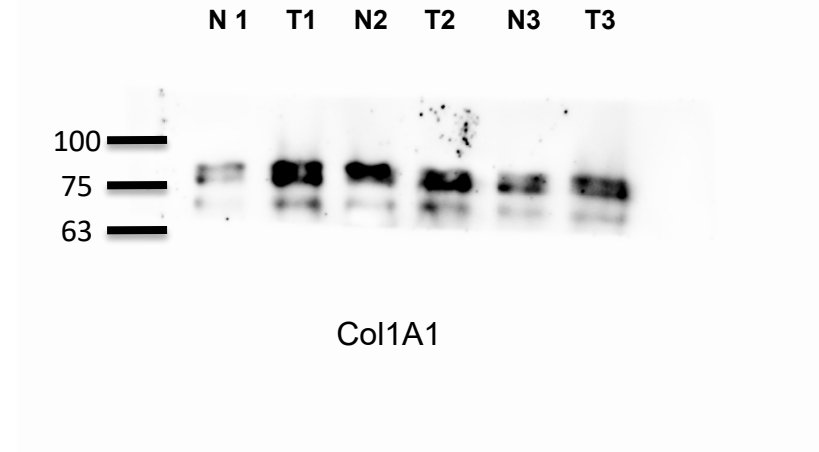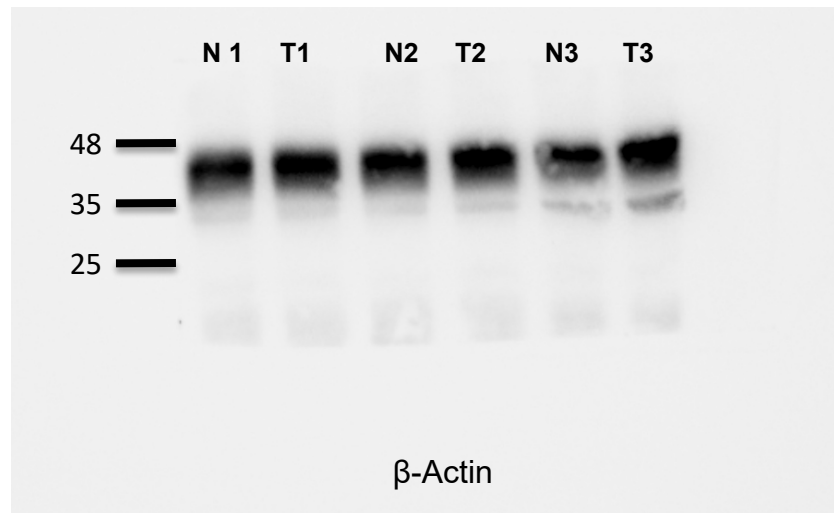

All bands were detected using chemiluminescence
