# Supplementary material for: Reciprocal interplay between asporin and decorin: Implications in gastric cancer prognosis
Source: PLoS One. 2021 Aug 11;16(8):e0255915. doi: 10.1371/journal.pone.0255915 (PMC8357146; doi:10.1371/journal.pone.0255915)
Supplement: S1 Table — (XLSX) [file pone.0255915.s003.xlsx]

## Sheet: Sheet1
S1 Table. Primer Sequence Table
Gene	Primer Sequence (5’- 3’)
ACTB Forward	GCCGCCAGCTCACCA
ACTB Reverse	CACGATGGAGGGGAAGACG
ASPN Forward	GACCTCAGTCCCAACCAACAT
ASPN Reverse	TCAGGATCAGACCATAAAGTGAAGT
DCN Forward	AAGTACATCCAGGTTGTCTACCTTC
DCN Reverse	GCTGAAAAGACTCACACCCGA
FN1 Forward	GAACATGGTTTTAGGCGGACC
FN1 Reverse	TCTTGTCCTACATTCGGCGG
