# Supplementary material for: Reciprocal interplay between asporin and decorin: Implications in gastric cancer prognosis
Source: PLoS One. 2021 Aug 11;16(8):e0255915. doi: 10.1371/journal.pone.0255915 (PMC8357146; doi:10.1371/journal.pone.0255915)
Supplement: S3 Table — (XLSX) [file pone.0255915.s005.xlsx]

## Sheet: Sheet1
S3 Table. Endo Cohort Patient’s
Characteristics	Number of OT cohort patients (%)	Overexpressed in tumor	Under expressed in tumor	Fischer’s test p value
Gender				1
Male	28/35(80%)	22	6
Female	07/35(20%)	4	3
Age (years)				1
>60	13/35(~37%)	12	1
≤60	22/35(~63%)	14	8
Lauren’s subtype				1
Intestinal	12/35(~34%)	9	3
Diffuse + diffuse with signet ring	23/35(~66%)	17	6
Differentiation				0.352
Poor, Moderate	11/35(~31%)	3	8
Well	24/35(~69%)	23	1
