# Supplementary material for: Reciprocal interplay between asporin and decorin: Implications in gastric cancer prognosis
Source: PLoS One. 2021 Aug 11;16(8):e0255915. doi: 10.1371/journal.pone.0255915 (PMC8357146; doi:10.1371/journal.pone.0255915)
Supplement: S4 Table — (XLSX) [file pone.0255915.s006.xlsx]

## Sheet: Sheet1
S4 Table. IHC patient’s details
Patient’s Code	Age	Gender	Histopathological Type	Staining Score (0/1/2/3)
CMCOT02 Tumor	55	M	Diffuse	1
OT63 Tumor	44	M	Diffuse	1
OT33 Tumor	38	M	Diffuse	1
OT54 Tumor	68	M	Intestinal	1
OT64 Tumor	52	M	Diffuse	2
OT41 Tumor	40	M	Diffuse	2
OT52 Tumor	52	F	Diffuse	2
18G1078 Tumor	53	M	Intestinal	2
OT62 Tumor	70	M	Intestinal	2
18S292 Tumor	57	F	Intestinal	2
18S121 Tumor	65	F	Intestinal	2
OT15 Tumor	60	F	Intestinal	3
OT63 Normal	44	M		0
OT42 Normal	45	M		0
OT65 Normal	47	M		0
OT62 Normal	47	M		0
