# Supplementary material for: Reciprocal interplay between asporin and decorin: Implications in gastric cancer prognosis
Source: PLoS One. 2021 Aug 11;16(8):e0255915. doi: 10.1371/journal.pone.0255915 (PMC8357146; doi:10.1371/journal.pone.0255915)
Supplement: S5 Table — (XLSX) [file pone.0255915.s007.xlsx]

## Sheet: Sheet1
S5 Table. Expression fold changes of 58 genes with respect to adjacent normal samples that showed stage-wise upregulated in TCGA-STAD
Gene	Pathological stage 1-2		Pathological stage 3		Pathological stage 4
	log2 fold change	p (FDR)	log2 fold change	p (FDR)	log2 fold change	p (FDR)
COL10A1	6.71	9.71e-56	7	6.25e-94	7.13	4.04e-84
IGFL2	3.01	2.02e-12	3.5	1.26e-18	3.83	8.01e-18
ADAM12	3.54	9.16e-32	3.72	5.33e-40	3.76	5.19e-39
PRKCG	2.97	3.74e-15	3.56	1.08e-21	3.58	2.13e-17
IDO1	2.14	1.93e-08	3	2.66e-13	3.55	5.73e-16
INHBA	3.17	1.94e-26	3.45	1.09e-45	3.54	4.77e-39
CXCL9	2.53	6.55e-13	3.12	3.49e-18	3.53	1.84e-22
HTRA4	2.68	1.29e-15	2.93	7.83e-20	3.06	4.06e-21
UBD	2.3	9.01e-11	2.79	6.46e-16	2.85	1.64e-13
MUC5B	3.02	7.84e-08	2.74	5.79e-08	2.81	5.74e-08
COL22A1	2.46	1.54e-11	2.7	2.19e-17	2.77	5.36e-15
NXPH4	1.96	5.77e-07	2.12	5.45e-08	2.64	1.33e-09
LRRN4	2.27	6.92e-10	2.46	4.76e-12	2.51	8.8e-10
ECT2	2.31	4.41e-33	2.42	5.47e-40	2.45	9.55e-45
UTS2	2.02	1.71e-06	2.02	1.15e-06	2.44	3.14e-07
MTHFD1L	1.78	1.55e-37	1.84	1.92e-52	2.04	7.81e-51
NUP62CL	1.81	7.52e-13	1.89	8.77e-13	1.91	2.46e-14
SNX10	1.62	5.6e-17	1.8	9.32e-23	1.86	1.19e-22
COL8A1	1.16	0.000521981	1.66	6.57e-09	1.86	7.96e-10
STC2	1.46	3.22e-08	1.63	4.49e-12	1.82	1.8e-11
SLC39A10	1.57	7.19e-21	1.77	5.49e-33	1.8	3.4e-36
HAPLN3	1.48	5.26e-11	1.67	8.48e-16	1.77	1.31e-13
ITGA11	1.36	2.04e-06	1.63	6.46e-11	1.76	2.66e-13
DKK2	1.12	0.00250111	1.55	1.12e-06	1.75	2.01e-07
CD80	1.33	7.38e-07	1.48	1.09e-08	1.69	6.25e-10
SLC5A2	1.58	1.87e-11	1.63	4.58e-12	1.65	3.42e-12
F2R	1.32	7.01e-12	1.48	4.51e-19	1.63	1.38e-21
SGOL2	1.5	7.04e-18	1.56	3.65e-20	1.62	2.25e-21
TBC1D30	1.28	1.15e-09	1.33	2.95e-11	1.57	9.86e-12
MMS22L	1.34	1.18e-17	1.37	3.44e-25	1.45	3.77e-27
STAT1	1.13	1.91e-11	1.24	1.29e-13	1.43	3.77e-15
DPY19L1	1.18	8.85e-16	1.28	5.35e-20	1.42	3.83e-24
ASPN	0.73	0.0520839	1.16	6.06e-05	1.41	7.92e-06
PARP14	1.12	1.94e-16	1.29	1.83e-19	1.41	5.39e-18
NALCN	0.77	0.0409973	1.2	8.89e-05	1.36	1.51e-05
NHS	0.92	4.78e-05	1.12	8.93e-08	1.34	9.71e-12
BORA	1.21	3.58e-12	1.24	4.28e-13	1.28	1.43e-14
RBL1	1.2	1.34e-18	1.26	9.55e-22	1.28	3.41e-24
NUDCD1	1.24	2.85e-22	1.27	5.13e-22	1.28	3.87e-22
PRRX1	0.76	0.0156365	1.05	1.78e-05	1.25	1.74e-06
ITGBL1	0.77	0.0575869	1.1	0.0015375	1.23	0.000351608
TRIM46	0.8	0.000234932	1.18	1.1e-07	1.21	3.29e-07
ZNF525	1.03	2.88e-06	1.13	3.21e-08	1.21	2.62e-10
FMNL2	0.85	8.38e-09	1.08	9.96e-16	1.2	2.68e-21
MANEAL	1.07	4.15e-06	1.17	1.6e-06	1.18	4.03e-07
STAMBPL1	0.95	7.41e-08	1.02	5.99e-10	1.17	2.84e-12
CCT6A	0.91	4.54e-17	0.94	4.66e-17	1.12	4.79e-14
CMTM1	0.94	1.5e-09	1.06	3.51e-12	1.12	1.84e-14
PVR	0.93	1.68e-09	1.07	4.92e-13	1.11	2.12e-10
NUP155	0.92	2.18e-11	1.04	6.7e-16	1.08	1.99e-14
CBFB	0.88	1.17e-12	0.99	1.14e-19	1.08	2.05e-22
MORC4	0.88	1.11e-07	1.04	1.24e-09	1.07	3.01e-11
RFWD3	0.95	3.93e-15	1.03	1.65e-18	1.07	1.1e-18
TMEM194A	0.85	2.21e-08	0.9	3.72e-11	1.06	4.21e-12
COLGALT1	0.87	8.11e-17	0.94	4.04e-21	1.02	8.02e-27
CCSAP	0.75	8.41e-10	0.82	3.07e-12	1.01	3.07e-14
XPOT	0.75	1.26e-11	0.9	3.96e-11	1	1.37e-11
RNF219	0.8	1.02e-11	0.89	2.5e-14	1	7.51e-15
